# Supplementary material for: Coordinate and redox interactions of epinephrine with ferric and ferrous iron at physiological pH
Source: Springer Nature journal article supplement (doi:10.1038/s41598-018-21940-7), 2018-02-19
Supplement: MOESM1 [file 41598_2018_21940_MOESM1_ESM.pdf]

Supplementary data for the article:

Korać, J.; Stanković, D. M.; Stanić, M.; Bajuk-Bogdanović, D.; Žižić, M.; Pristov, J. B.; Grgurić-Šipka, S.; Popović-Bijelić, A.; Spasojević, I. Coordinate and Redox Interactions of Epinephrine with Ferric and Ferrous Iron at Physiological PH. *Scientific Reports* **2018**, *8* (1). <https://doi.org/10.1038/s41598-018-21940-7>

**Coordinate and redox interactions of epinephrine with ferric and ferrous iron at  
physiological pH**

Jelena Korać, Dalibor M. Stanković, Marina Stanić, Danica Bajuk-Bogdanović, Milan Žižić,  
Jelena Bogdanović Pristov, Sanja Grgurić-Šipka, Ana Popović-Bijelić, Ivan Spasojević

**Supplementary Information**

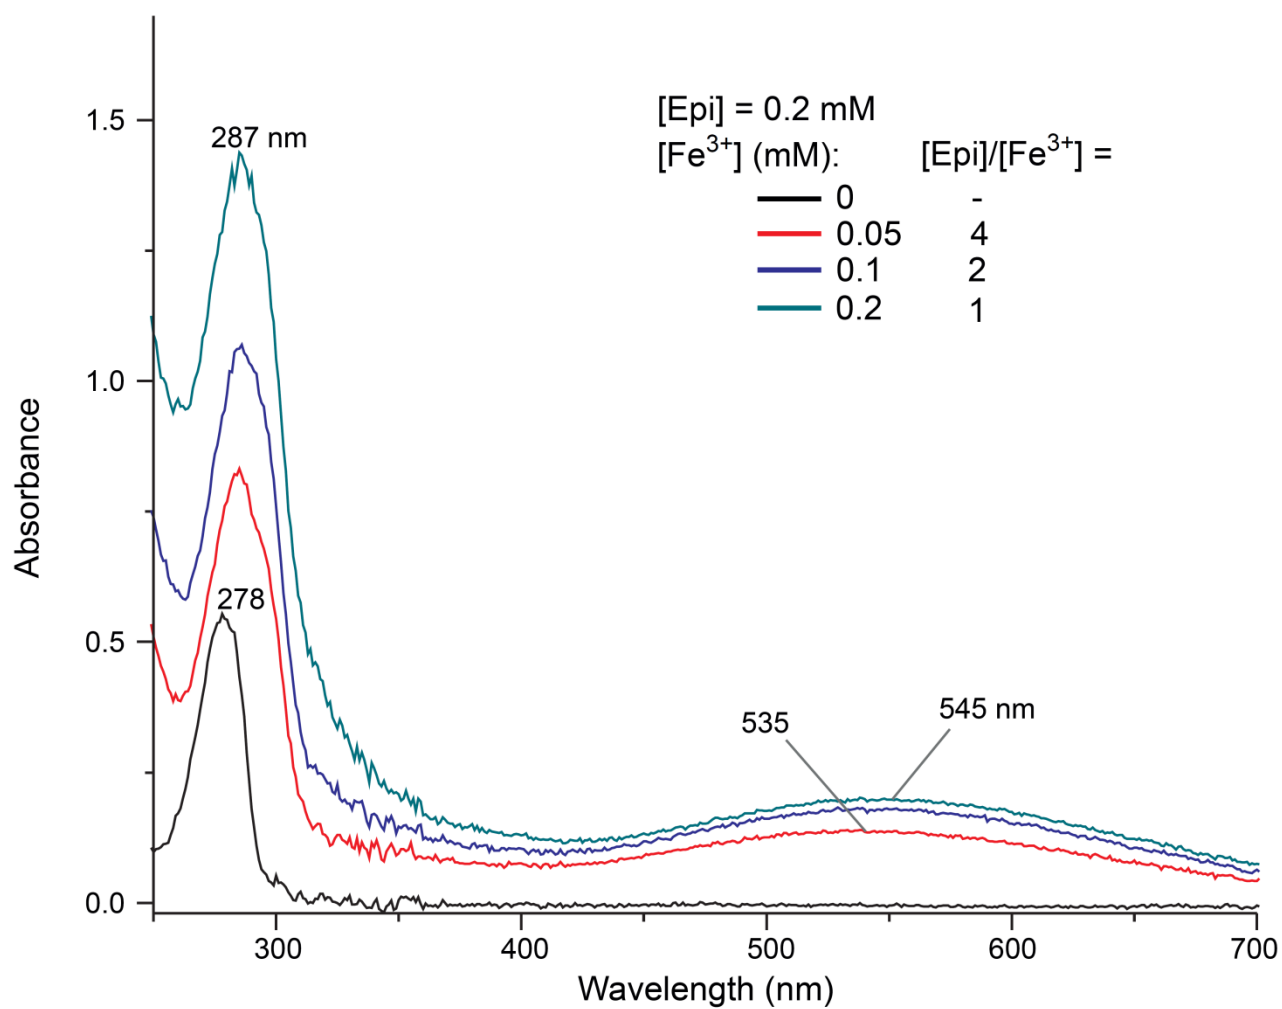

**Figure S1 UV/Vis spectra of Epi and ferric iron in 10 mM phosphate buffer, pH 7.4.** In contrast to Tris, the same complex appears to predominate at both low and high [Epi]/[Fe<sup>3+</sup>] ( $\lambda_{\text{max}} = 545 \text{ nm}$ ), most likely in relation to the high affinity of phosphates for Fe<sup>3+</sup>. The spectra were acquired following 15 min incubation, and remained unaltered for at least 1 h.

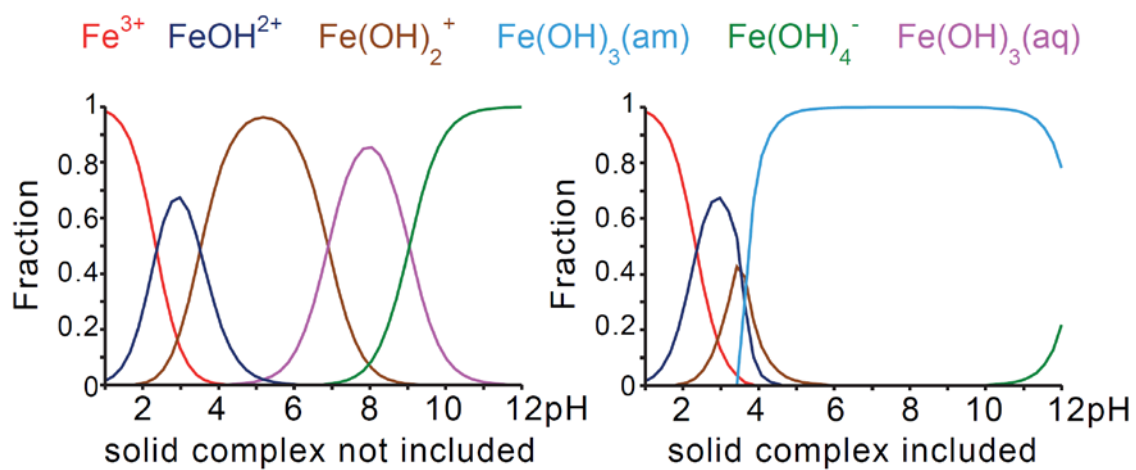

**Figure S2 Speciation diagrams of  $\text{Fe}^{3+}$  in water.** Diagrams were prepared in Hydra-Medusa Software, using the following parameters:  $[\text{Fe}^{3+}] = 0.1 \text{ mM}$ ; pH range 1–12;  $T = 293 \text{ K}$ .

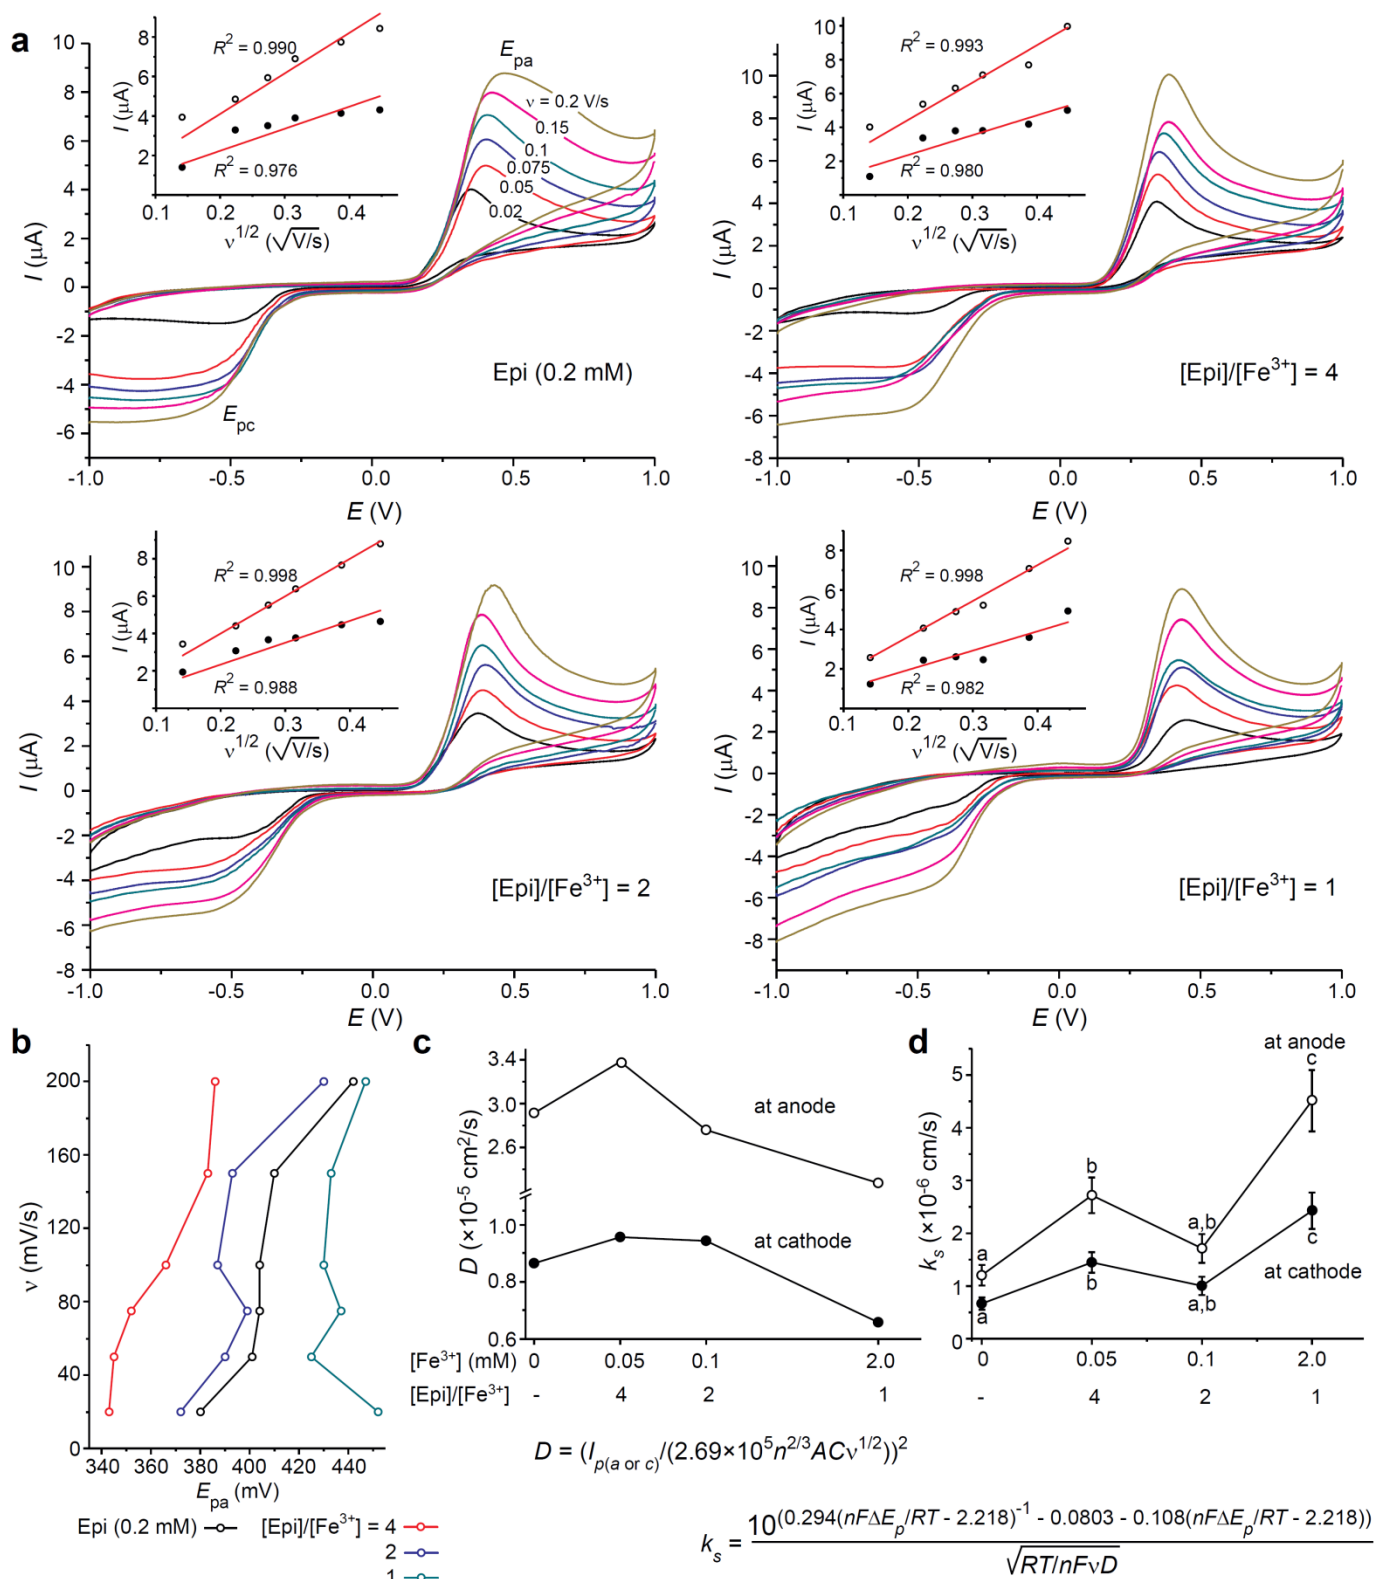

**Figure S3 Scan rate analysis of the Epi/Fe<sup>3+</sup> systems.** (a) Cyclic voltammograms of Epi in absence or presence of Fe<sup>3+</sup> at the boron doped diamond electrode obtained at different scan rates ( $v = 0.02\text{--}0.2$  V/s). The inset figures in each panel represent the dependence between  $I_{pa}$  (open circles) and  $I_{pc}$  (closed circles; absolute values) and  $v^{1/2}$ . Linear fit and  $R^2$  values are presented. (b)  $E_{pa}$  for Epi and  $[Epi]/[Fe^{3+}] = 4, 2, 1$ .

and 1 at different  $v$ . (c)  $D$  for Epi and different  $[\text{Epi}]/[\text{Fe}^{3+}]$ . Randles–Sevcik equation (at the bottom middle):  $n$ , number of transferred  $e^-$ ;  $A$ , area of the working electrode ( $0.0707 \text{ cm}^2$ );  $C$ , concentration of redox species in solution ( $\text{mol}/\text{cm}^3$ ). (d) Rate constants of electron transfer ( $k_s$ ) for Epi and different  $[\text{Epi}]/[\text{Fe}^{3+}]$ . Results are presented as means ( $\pm$  SE) of measurements made at various  $v$ .  $k_s$  not sharing a common letter are significantly different ( $P < 0.05$ ). Nicholson Shain calculus (at the bottom right):  $R$ , standard gas constant;  $T$ , temperature (298 K);  $F$ , Faraday's constant;  $\Delta E_p$ , the difference between  $E_{pa}$  and  $E_{pc}$  taken at various  $v$ .

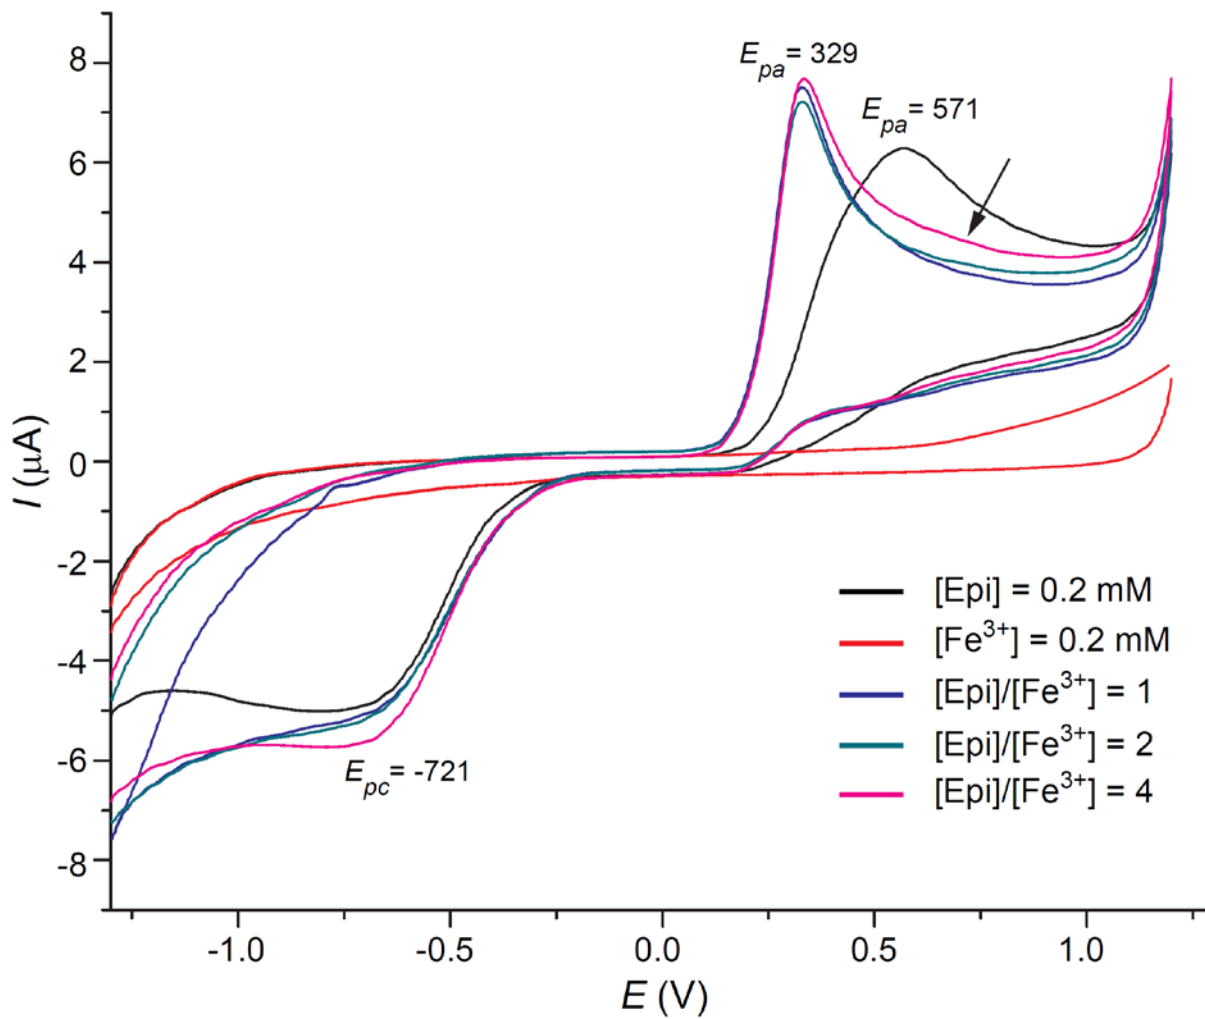

Figure S4 Cyclic voltammograms of Epi in absence or presence of  $\text{Fe}^{3+}$  in 10 mM potassium phosphate buffer, pH 7.4, at the boron doped diamond electrode. The oxidation/anodic ( $E_{pa}$ ) and reduction/cathodic ( $E_{pc}$ ) potentials are presented. Scan rate was 0.1 V/s.

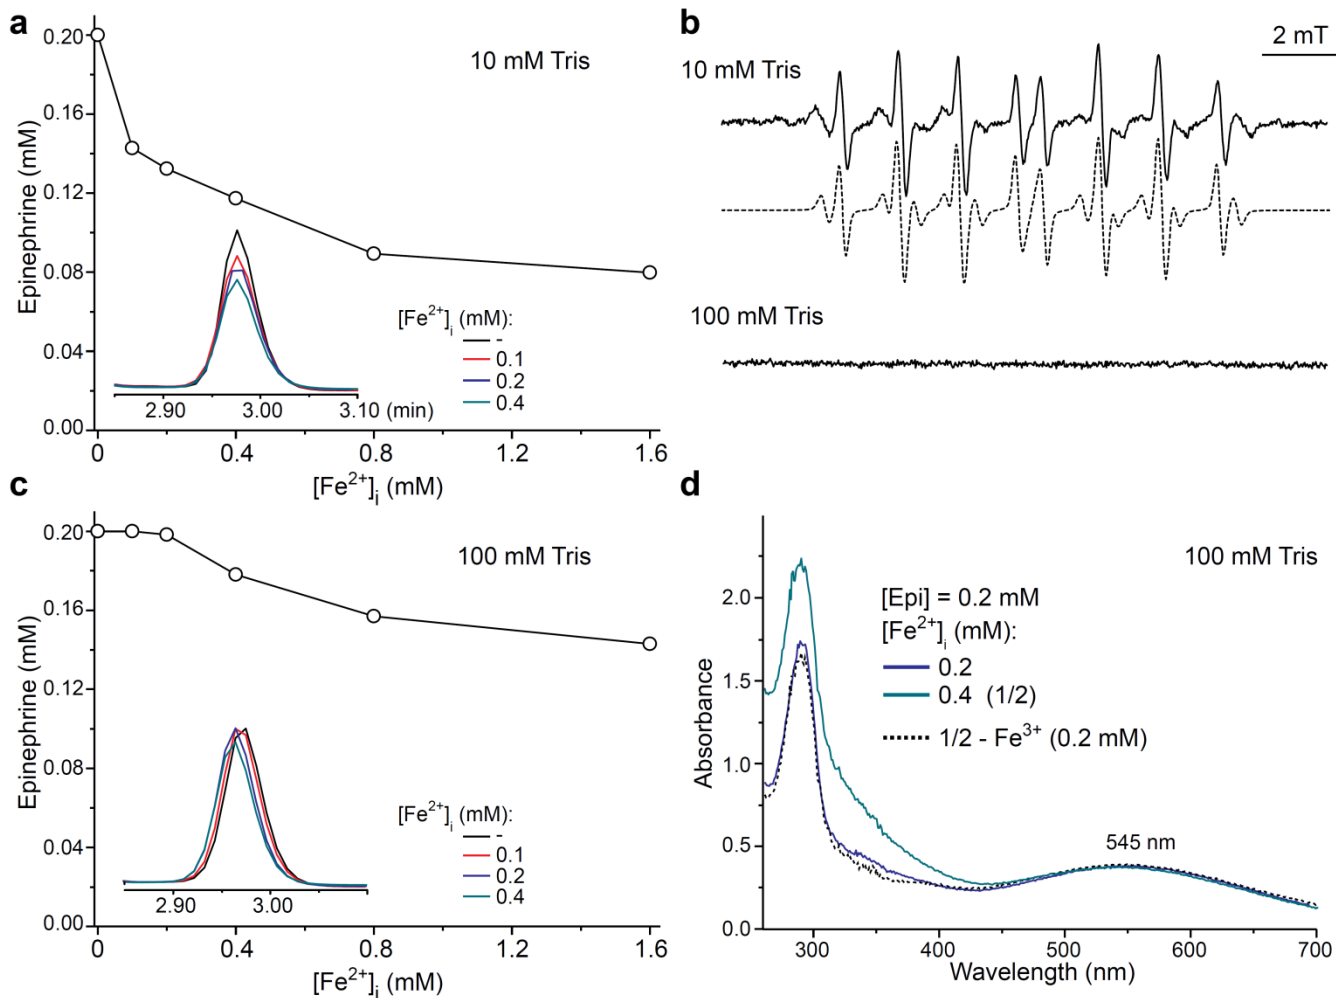

**Figure S5 Antioxidative performance of 10 mM and 100 mM Tris, pH 7.4.** (a) The concentration of Epi following 5 min incubation with different [Fe<sup>2+</sup>]<sub>i</sub> in 10 mM Tris buffer. Inset: Epi peaks in HPLC chromatograms. (b) EPR spectra of adducts of DEPMPO spin trap (5 mM), illustrating the capacity of Tris to remove hydroxyl radical (HO<sup>•</sup> is produced in the Fenton reaction: Fe<sup>2+</sup> (0.4 mM) + H<sub>2</sub>O<sub>2</sub> (1.2 mM)). Spectrum in 10 mM Tris is composed of DEPMPO adducts with HO<sup>•</sup> (65%) and Tris-derived C-centred radical (35%), as determined by spectral simulation (dashed line). No EPR signal could be observed in 100 mM Tris. (c) The concentration of Epi following 5 min incubation with different [Fe<sup>2+</sup>]<sub>i</sub> in 100 mM Tris buffer. Inset: Epi peaks in HPLC chromatograms. (d) UV-Vis spectra of Epi/Fe<sup>2+</sup> systems after 5 min incubation in 100 mM Tris. No further changes were observed. Dashed line represents the subtraction of experimental spectra. The resulting spectrum with λ<sub>max</sub> = 545 nm in the system with [Epi]/[Fe<sup>2+</sup>]<sub>i</sub> = 0.5, represents the sum of the spectrum for [Epi]/[Fe<sup>2+</sup>]<sub>i</sub> = 1 and the spectrum of [Fe<sup>3+</sup>] = 0.2 mM.



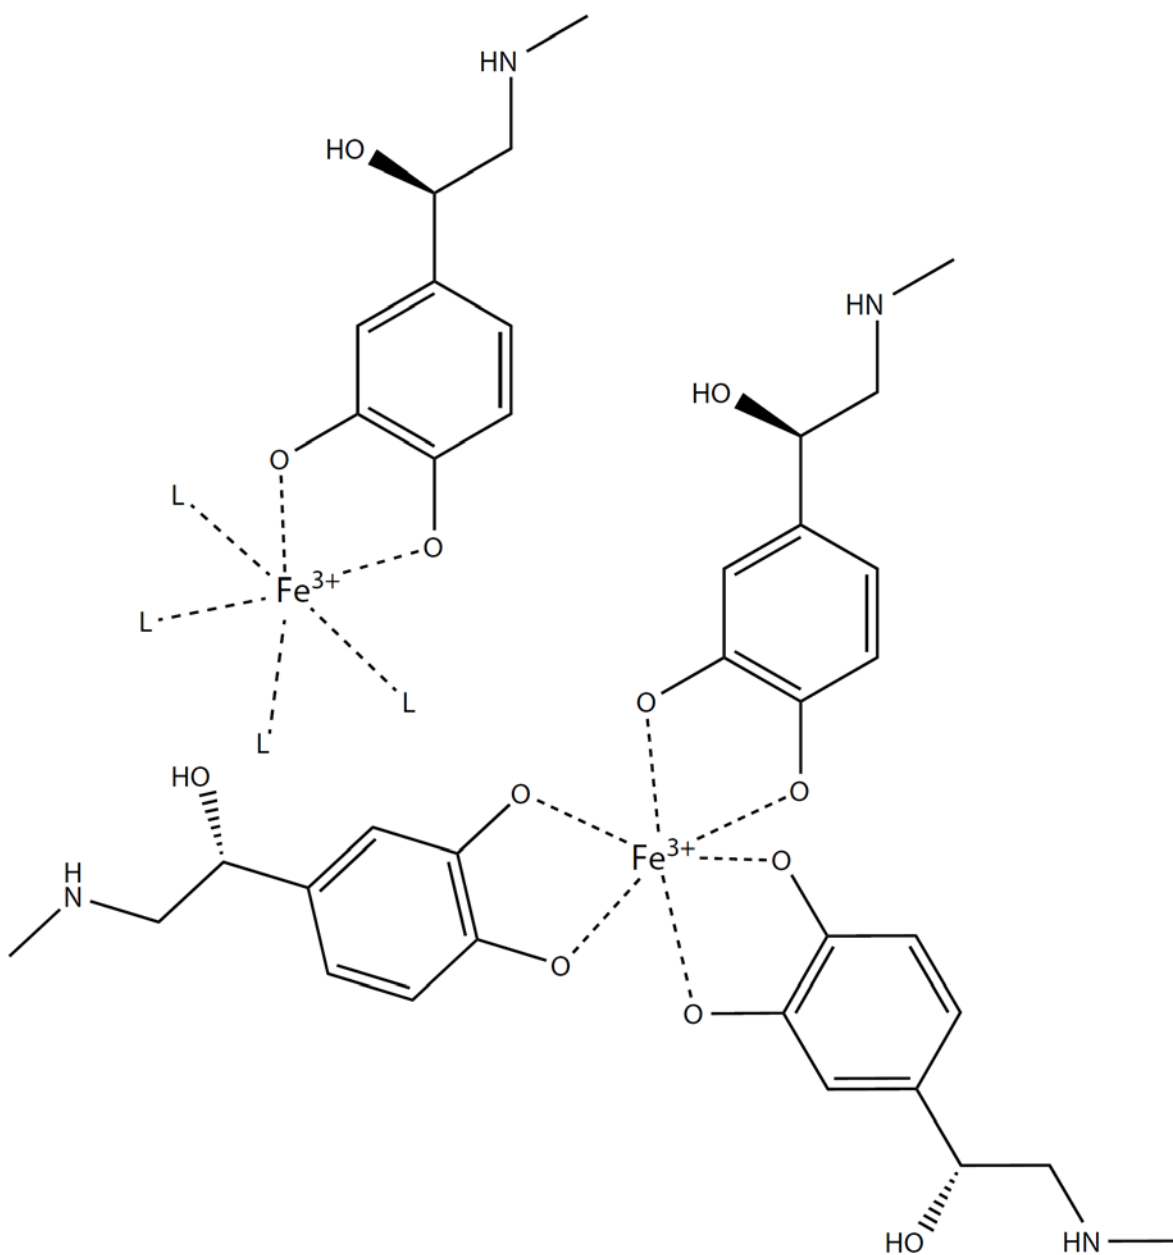

Figure S6 Schematic presentation of the chemical structures of Epi-Fe<sup>3+</sup> complexes. L – other ligands (e.g. OH<sup>-</sup>, HPO<sub>4</sub><sup>2-</sup>, H<sub>2</sub>PO<sub>4</sub><sup>-</sup>, H<sub>2</sub>O).

**Table S1 Reactions that are relevant for Fe<sup>2+</sup> oxidation at pH 7.4.**

| No              | Reaction                                                                                                 | k (M <sup>-1</sup> s <sup>-1</sup> ) | Ref |
|-----------------|----------------------------------------------------------------------------------------------------------|--------------------------------------|-----|
| 1               | $\text{Fe}^{2+} + \text{O}_2 \rightarrow \text{Fe}^{3+} + \text{O}_2^{\bullet-}$                         | $4 \times 10^{-2}$                   | (a) |
| 2               | $\text{Fe}^{2+} + \text{O}_2^{\bullet-} + 2\text{H}^+ \rightarrow \text{Fe}^{3+} + \text{H}_2\text{O}_2$ | $1 \times 10^7$                      | (b) |
| 3               | $\text{Fe}^{3+} + \text{O}_2^{\bullet-} \rightarrow \text{Fe}^{2+} + \text{O}_2$                         | $1.5 \times 10^8$                    |     |
| 4 <sup>*</sup>  | $\text{Fe}^{2+} + \text{H}_2\text{O}_2 \rightarrow \text{Fe}^{3+} + \text{HO}^{\bullet} + \text{OH}^-$   | $10^2$                               |     |
| 5               | $\text{Fe}^{2+} + \text{HO}^{\bullet} \rightarrow \text{FeOH}^{2+}$                                      | $3.2 \times 10^8$                    |     |
| 6 <sup>**</sup> | $2\text{H}_2\text{O}_2 \text{ (CAT)} \rightarrow 2\text{H}_2\text{O} + \text{O}_2$                       |                                      |     |

<sup>\*</sup> Fenton reaction; <sup>\*\*</sup>The mechanism of catalase-mediated degradation of H<sub>2</sub>O<sub>2</sub>. The concentration of accumulated H<sub>2</sub>O<sub>2</sub> is calculated as 2×Δ[O<sub>2</sub>] that is induced by CAT.

(a) King, D. W.; Lounsbury, H. A.; Millero, F. J. *Environ. Sci. Technol.*, 1995, **29**, 818-825.

(b) Halliwell, B. & Gutteridge, J. M. C. *Free Radicals in Biology and Medicine*, 4th ed, Clarendon Press, Oxford, 2007.
